# Supplementary material for: Loss of progesterone receptor is associated with distinct tyrosine kinase profiles in breast cancer
Source: Springer Nature journal article supplement (doi:10.1007/s10549-020-05763-7), 2020-07-24
Supplement: MOESM1 [file 18213248]

| Sample ID | Gender | Histology      | Age at op. | ER status | PR status | Her2 status | Ki-67 % | Ki-67% Hotspot | Grade | T  | N          |
|-----------|--------|----------------|------------|-----------|-----------|-------------|---------|----------------|-------|----|------------|
| CM549T    | Female | muc adeno      | 89         | >50       | >50       | -           | 27-21   | 21             | II    |    | 2 0        |
| CM561T    | Female | IDC            | 67         | >50       | >10       | -           | 20-24   | 24             | II    | 1b | 0 (15)     |
| CM575T    | Female | IDC            | 78         | >50       | >10       | -           | 15-38   | 38             | III   |    | 2 1 (3/16) |
| CM576T    | Female | muc ca         | 73         | >50       | >50       | -           | 15-24   | 24             | II    |    | 2 0        |
| CM609T    | Female | IDC            | 48         |           | 100 -     | -           | >50     | 50             | II    |    | 2 0        |
| CM615T    | Female | IDC            | 80         | -         | >10       | 3+          | 28-45   | 45             | III   | 1c | 1 1/12     |
| CM617T    | Female | IDC            | 79         | >50       | >10       | -           | 6-10    | 10             | I     | 2  | 1 1/15     |
| CM619T    | Female | IDC            | 71         | >50       | >10       | -           | 28-38   | 38             | II    | 2  | 0          |
| CM623T    | Female | IDC            | 48         |           | 90        | 90 3+       | 26-43   | 43             | III   | 2  | 1 1/16     |
| CM624T    | Female | ILC            | 65         |           | 90        | 90 3+ (amp) | 55-70   | 70             | III   | 2  | 0          |
| CM630T    | Female | IDC            | 67         | >50       | >10       | -           | 40-55   | 55             | III   | 2  | 0          |
| CM636T    | Male   | IDC            | 71         | >50       | >10       | -           | 38-54   | 54             | III   | 2  | 1 1 /15    |
| CM638T    | Female | IDC            | 71         | >50       | >10       | -           | 5-15    | 15             | II    | 2  | 2 9/9      |
| CM641T    | Female | IDC            | 91         | -         | -         | 3+          | 24-42   | 42             | III   | 2  | 1 1/17     |
| CM651T    | Female | IDC            | 78         |           | 100       | 40 3+       | 19-33   | 33             | III   | 2  | 1 2/16     |
| CM656T    | Female | medular ca IDC | 37         | ~1-10     | -         | -           | 80      | 80             | III   | 2  | 0          |
| CM657T    | Female | IDC            | 77         | 90-100    | >50       | 3+          | 18-25   | 25             | II    | 2  | 1 1/7      |
| CM659T    | Female | IDC            | 63         | >50       | >10       | -           | ~10-15  | 15             | II    | 2  | 1 1/11     |
| CM712T    | Female | IDC            | 62         | >50       | -         | 3+          | 40-51   | 51             | III   | 1c | 2 4/10     |
| CM713T    | Female | IDC            | 56         | >10       | -         | 3+ (amp)    | 38-54   | 54             | III   | 2  | 0          |
| CM714T    | Female | IDC            | 44         |           | 90 >90    | 3+          | 44-48   | 48             | III   | 2  | 0          |
| CM733T    | Female | IDC            | 45         |           | 100       | 100 -       | 23      |                | 23 II | 1c | 0          |
| CM740T    | Female | IDC            | 49         | -         | -         | +           | 60-80   | 80             | III   | 2  | 0          |
| CM741T    | Female | IDC            | 67         | >80       | >50       | 3+          | 20-25   | 25             | II    | 1b | 0          |
| CM744T    | Female | IDC            | 63         |           | 100 >10   | + (amp)     | 23-38   | 38             | III   | 2  | 1 1/2      |
| CM748T    | Female | IDC            | 75         | >50       | -         | 3+          | 50-60   | 60             | III   | 2  | 0          |
| CM752T    | Female | IDC            | 65         |           | 100       | 50 -        | 2,3-4,5 | 4,5            | II    | 1c | 0          |
| CM764T    | Female | IDC            | 60         | >90       | -         | -           | 10-27   | 27             | I     | 2  | 0          |
| CM774T    | Female | IDC            | 79         | >50       | >50       | -           | 17-25   | 25             | II    | 1c | 1 1/3      |
| CM775T    | Female | IDC            | 77         | >50       | >10       | -           | 6-12    | 12             | II    | 2  | 3 10/21    |
| CM779T    | Female | IDC            | 66         | >50       | >10       | 3+          | 32-35   | 35             | III   | 1c | 0          |
| CM782T    | Female | Apokrin IDC    | 54         | 50        | -         | +           | 22-35   | 35             | III   | 1c | 1 2/18     |

**Abbreviations:** IDC - intraductal carcinoma, ILC: intralobular carcinoma, op- operation, ER- estrogen receptor, PR- progesterone receptor, T- tumor stage, N- lymphnode spread
