# Supplementary material for: Loss of progesterone receptor is associated with distinct tyrosine kinase profiles in breast cancer
Source: Springer Nature journal article supplement (doi:10.1007/s10549-020-05763-7), 2020-07-24

ZR751 MCF7 BT474

HER2

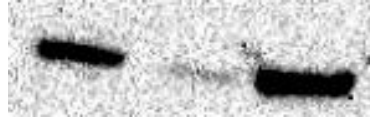

ER

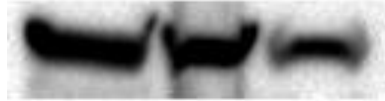

PR

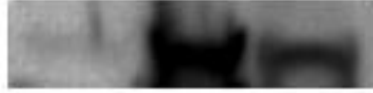

H3 control

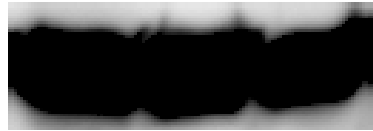

Supplement: MOESM2 [file 18213248]
