# Supplementary material for: Loss of progesterone receptor is associated with distinct tyrosine kinase profiles in breast cancer
Source: Springer Nature journal article supplement (doi:10.1007/s10549-020-05763-7), 2020-07-24
Supplement: MOESM3 [file 18213248]

| <b>Gene</b> | <b>Primer sequence</b>                                 |
|-------------|--------------------------------------------------------|
| FRK         | FW CGAGCAGGTGACAAACTTCA<br>REV TGCCTGTAGGCTTCTGTCCT    |
| LCK         | FW ATCCCTTACCCAGGGATGAC<br>REV TCAAGGCTGAGGCTGGTACT    |
| FGFR4       | FW AGCACCCCTACTGGACACACC<br>REV ACGCTCTCCATCACGAGACT   |
| MST1R       | FW CAAGGTCTGGACGACAACTATTG<br>REV CAGTGGTGGTATTGGCTGTG |
| ERBB2       | FW AAAGGCCCAAGACTCTCTCC<br>REV CAAGTACTCGGGGTTCTCCA    |
| ESR1        | FW TGATTGGTCTCGTCTGGCG<br>REV CATGCCCTCTACACATTTTCCC   |
| UBC         | FW ATTTGGGTCGCGGTTCTTG<br>REV TGCCTTGACATTCTCGATGGT    |
| TBP         | FW GCCAGCTTCGGAGAGTTCTG<br>REV GCACGAAGTGCAATGGTCTTT   |
