# Supplementary material for: Loss of progesterone receptor is associated with distinct tyrosine kinase profiles in breast cancer
Source: Springer Nature journal article supplement (doi:10.1007/s10549-020-05763-7), 2020-07-24
Supplement: MOESM4 [file 18213248]

**peptides in cluster 1**

41\_654\_666  
CBL\_693\_705  
CDK2\_8\_20  
EPHA1\_774\_786  
EPHA2\_765\_777  
EPHA7\_607\_619  
EPHB1\_771\_783  
EPOR\_361\_3732  
FAK2\_572\_584  
FER\_707\_719  
FES\_706\_718  
LAT\_249\_261  
LCK\_387\_399  
NTRK2\_696\_708  
P85A\_600\_612  
PAXI\_24\_36  
PDPK1\_2\_14  
PDPK1\_369\_381  
PECA1\_706\_718  
PGFRB\_1014\_1028  
RAF1\_332\_344  
RASA1\_453\_465  
RET\_1022\_1034  
VGFR2\_989\_1001  
ZAP70\_485\_497

**peptides in cluster 2**

ACHD\_383\_395  
ANXA1\_14\_26  
ANXA2\_17\_29  
CALM\_95\_107  
CD3Z\_116\_128  
CD3Z\_146\_158  
CDK7\_157\_169  
CTNB1\_79\_91  
DCX\_109\_121  
DYR1A\_312\_324  
EGFR\_1103\_1115  
EGFR\_1165\_1177  
EGFR\_1190\_1202  
EPOR\_419\_431  
ERBB2\_1241\_1253  
ERBB2\_870\_882  
FAK1\_569\_581  
FGFR1\_761\_773  
FGFR2\_762\_774  
FGFR3\_753\_765  
JAK1\_1015\_1027  
JAK2\_563\_577  
K2C6B\_53\_65  
K2C8\_425\_437  
KSYK\_518\_530  
LAT\_194\_206  
MBP\_198\_210  
MET\_1227\_1239  
MK01\_180\_192  
MK07\_211\_223  
MK10\_216\_228  
MK12\_178\_190  
NCF1\_313\_325  
NPT2A\_501\_513  
PGFRB\_1002\_1014  
PGFRB\_709\_721  
PGFRB\_768\_780  
PGFRB\_771\_783  
PP2AB\_297\_309  
PRGR\_786\_798  
PRRX2\_202\_214  
PTN11\_539\_551  
RB\_804\_816  
RON\_1346\_1358  
RON\_1353\_1365  
TEC\_512\_524  
TYRO3\_679\_691  
VGFR1\_1326\_1338  
VGFR2\_1052\_1064  
VGFR2\_1168\_1180  
VGFR2\_944\_956  
VGFR3\_1061\_1073  
VINC\_815\_827

**peptides in cluster 3**

AMPE\_5\_17  
B3AT\_39\_51  
C1R\_199\_211  
CRK\_214\_226  
DDR1\_506\_518  
DYR1A\_212\_224  
EGFR\_1118\_1130  
EPHA4\_589\_601  
EPHB1\_921\_933  
EPHB4\_583\_595  
ERBB4\_1181\_1193  
ERBB4\_1277\_1289  
INSR\_1348\_1360  
INSR\_992\_1004  
MBP\_259\_271  
MBP\_263\_275  
MK14\_173\_185  
ODBA\_340\_352  
RBL2\_99\_111  
STAT4\_714\_726  
TNNT1\_2\_14  
VGFR1\_1040\_1052  
VGFR1\_1049\_1061  
VGFR1\_1206\_1218  
VGFR1\_1235\_1247  
VGFR2\_1046\_1058
