# Supplementary material for: Loss of progesterone receptor is associated with distinct tyrosine kinase profiles in breast cancer
Source: Springer Nature journal article supplement (doi:10.1007/s10549-020-05763-7), 2020-07-24

# Kinase expression in Cluster 1 according to tumor subtype

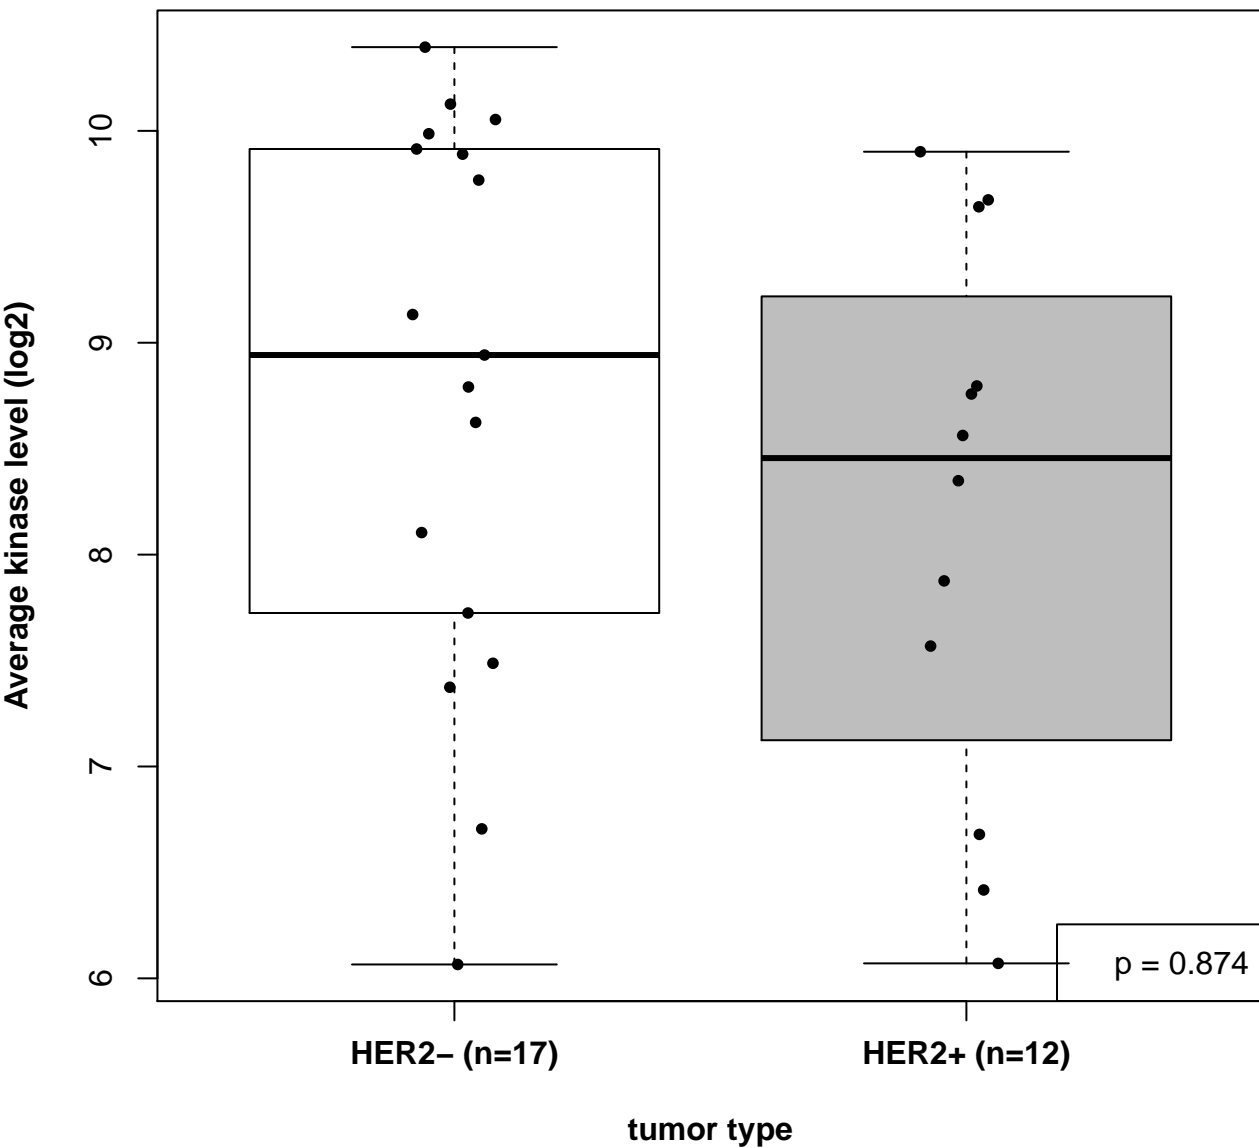

# Kinase expression in Cluster 2 according to tumor subtype

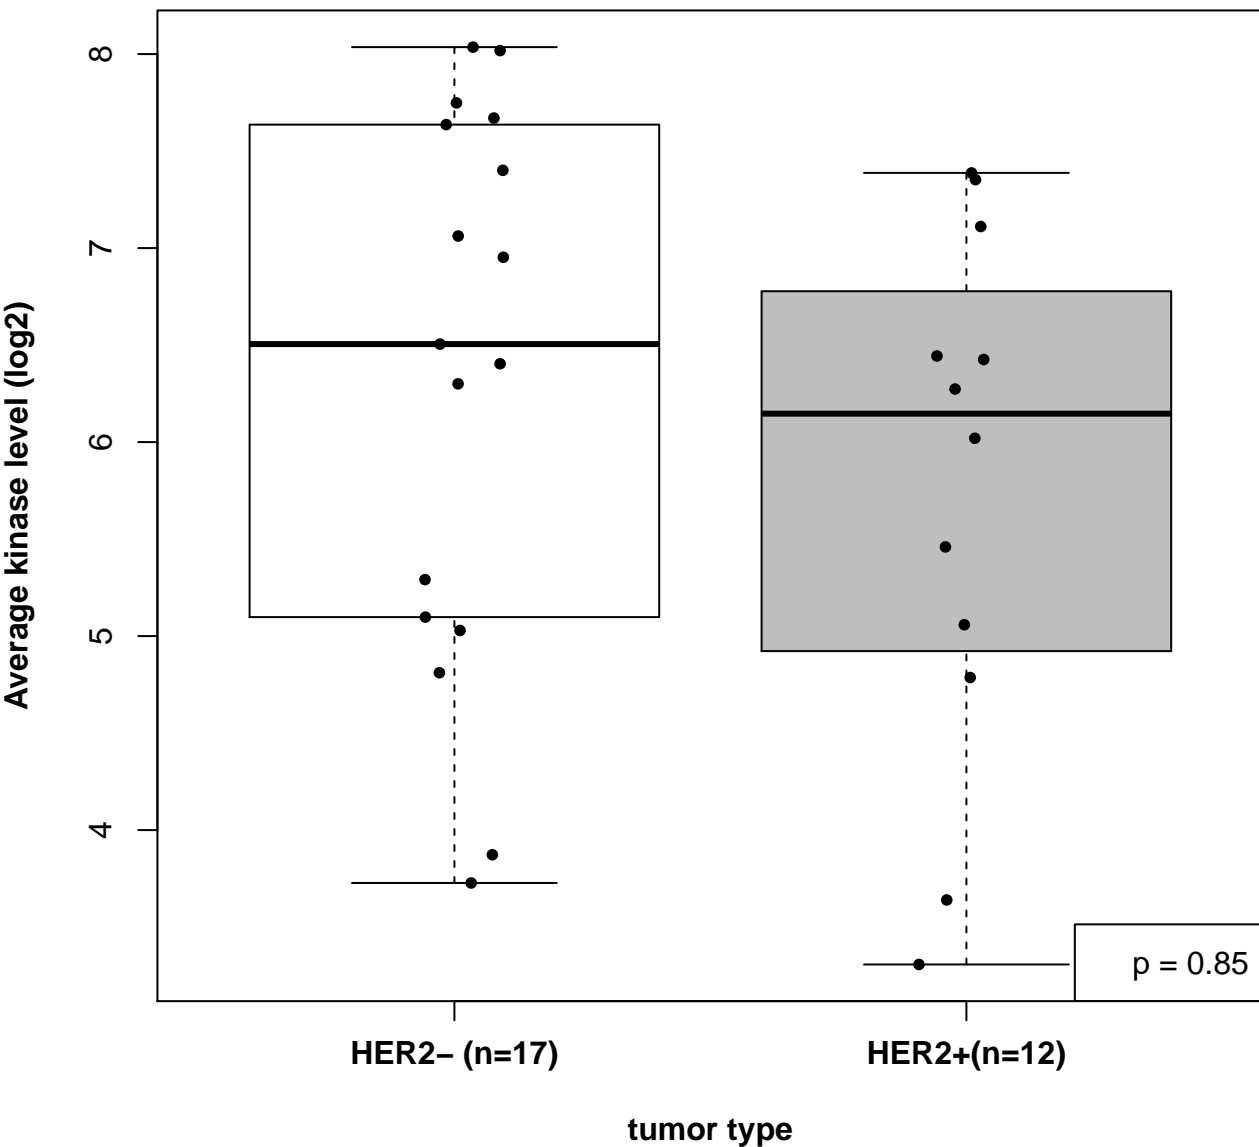

# Kinase expression in Cluster 3 according to tumor subtype

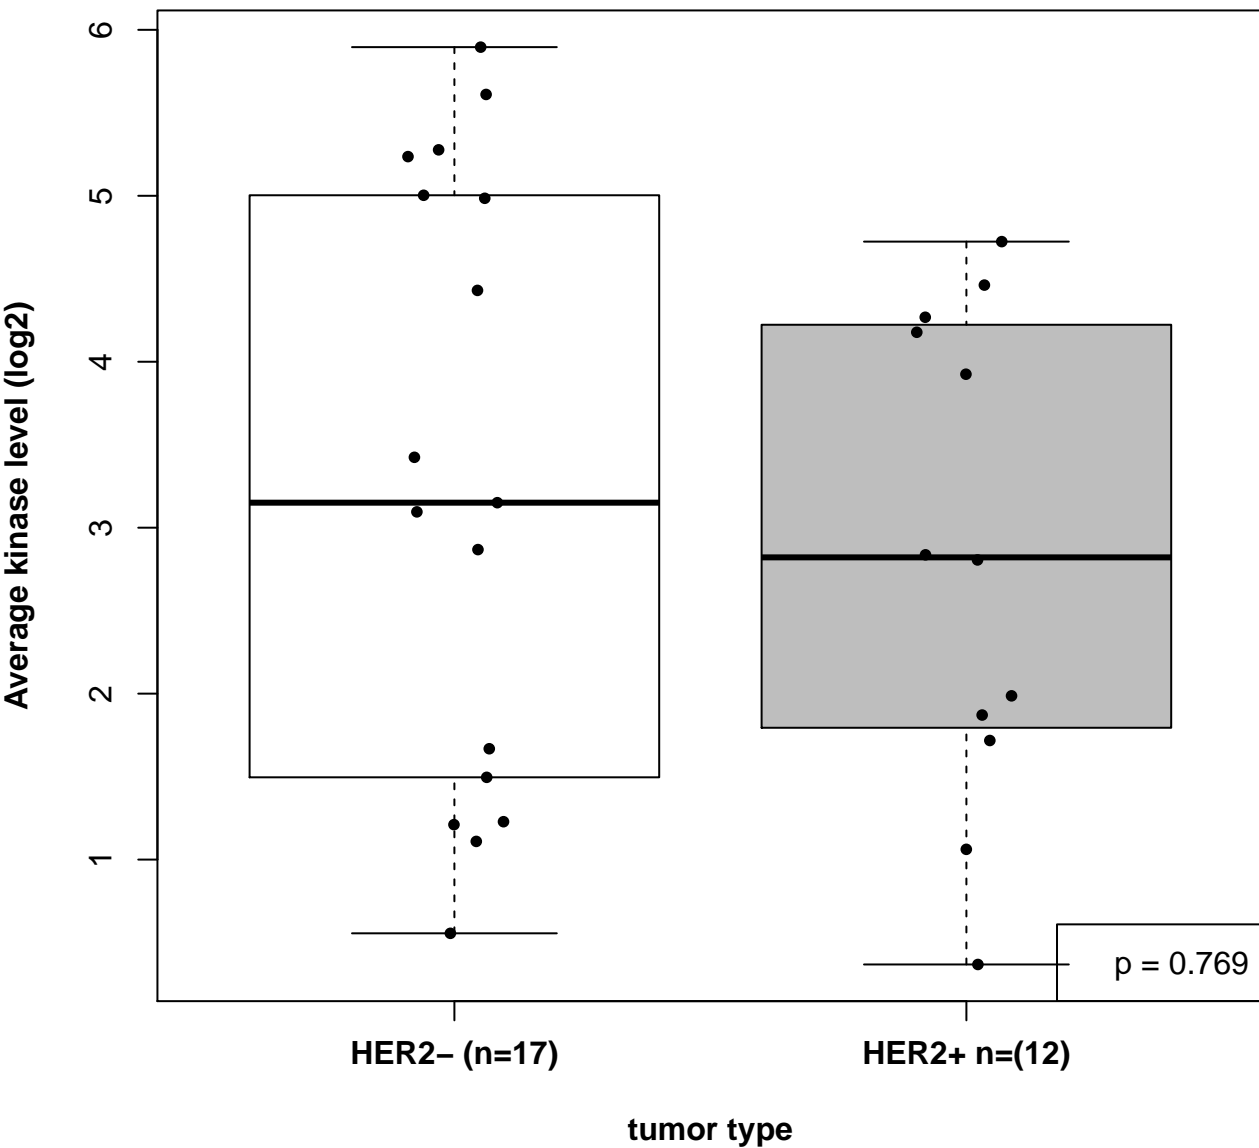

# Kinase expression in Cluster 1 according to PR status

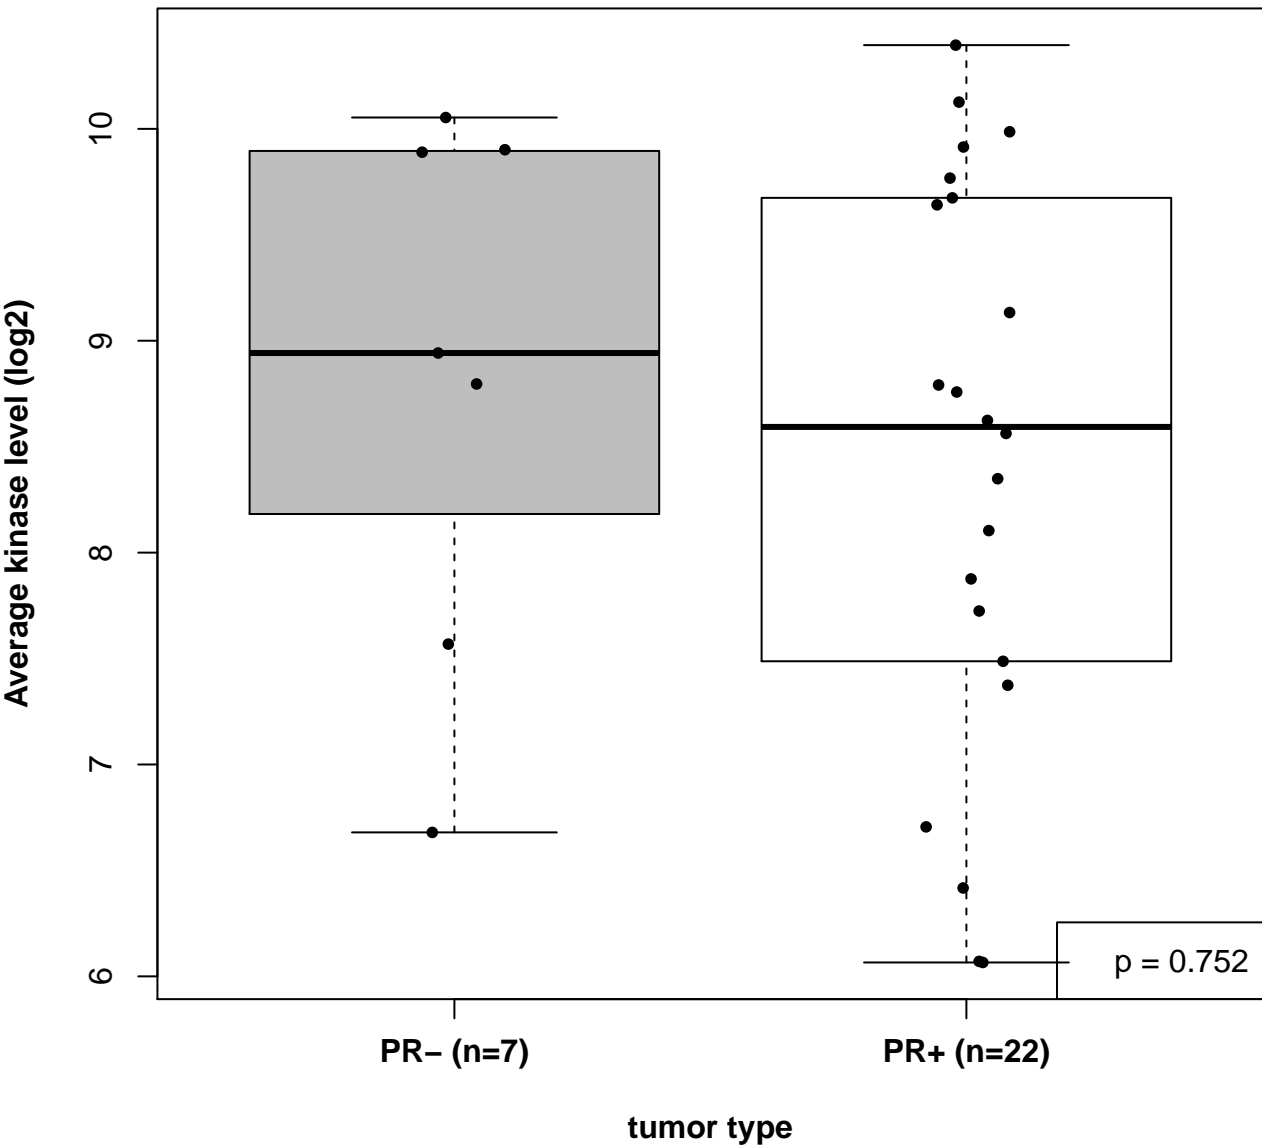

# Kinase expression in Cluster 2 according to PR status

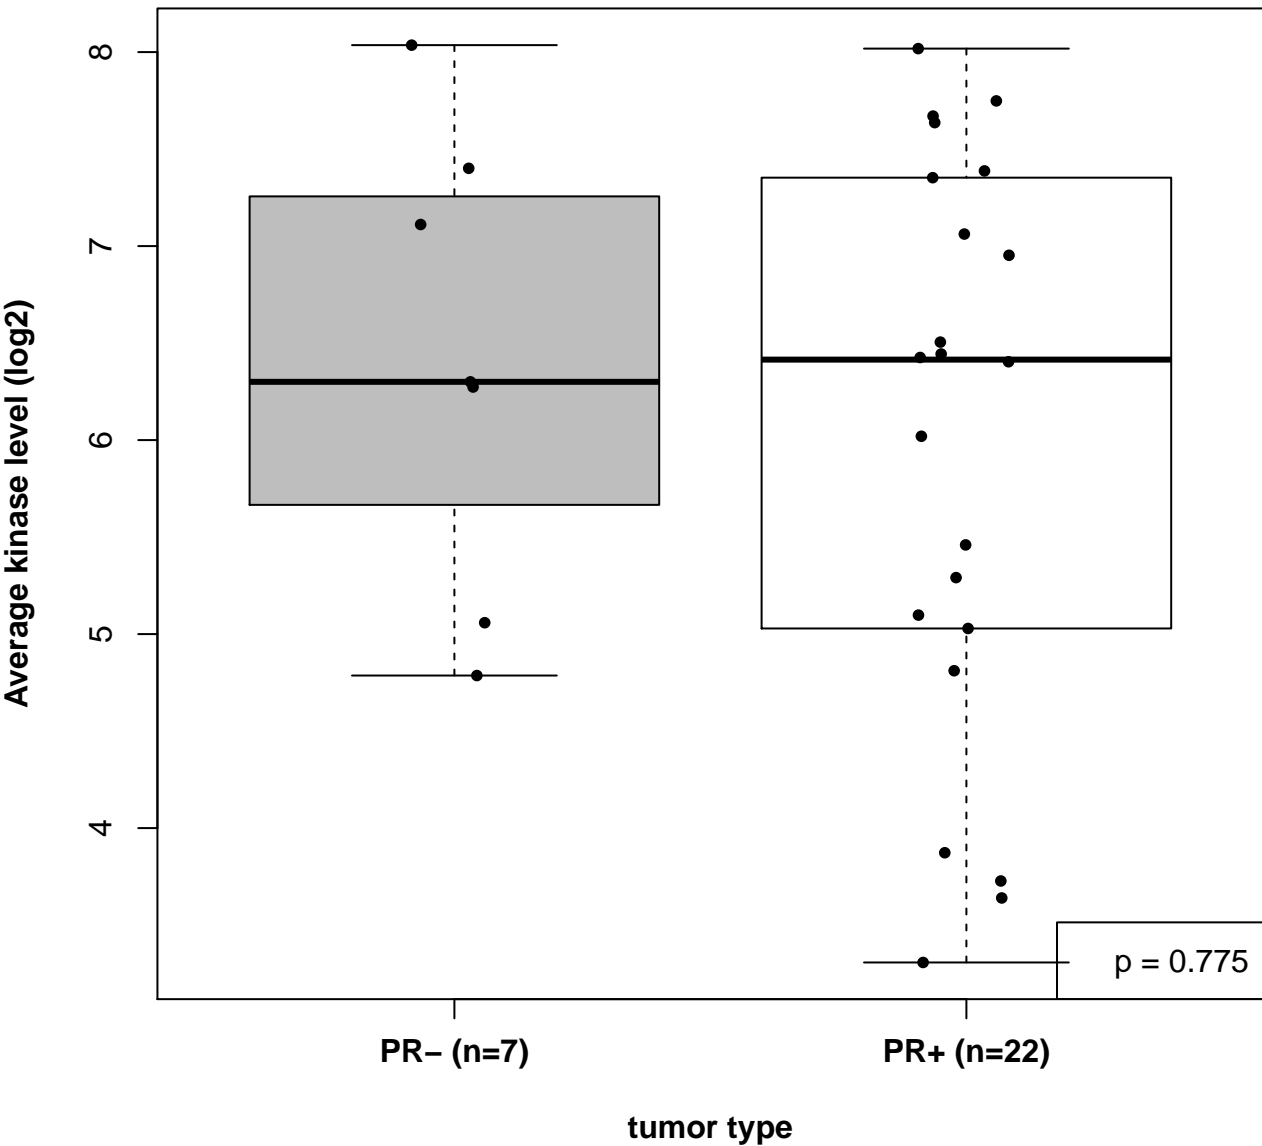

# Kinase expression in Cluster 3 according to PR status

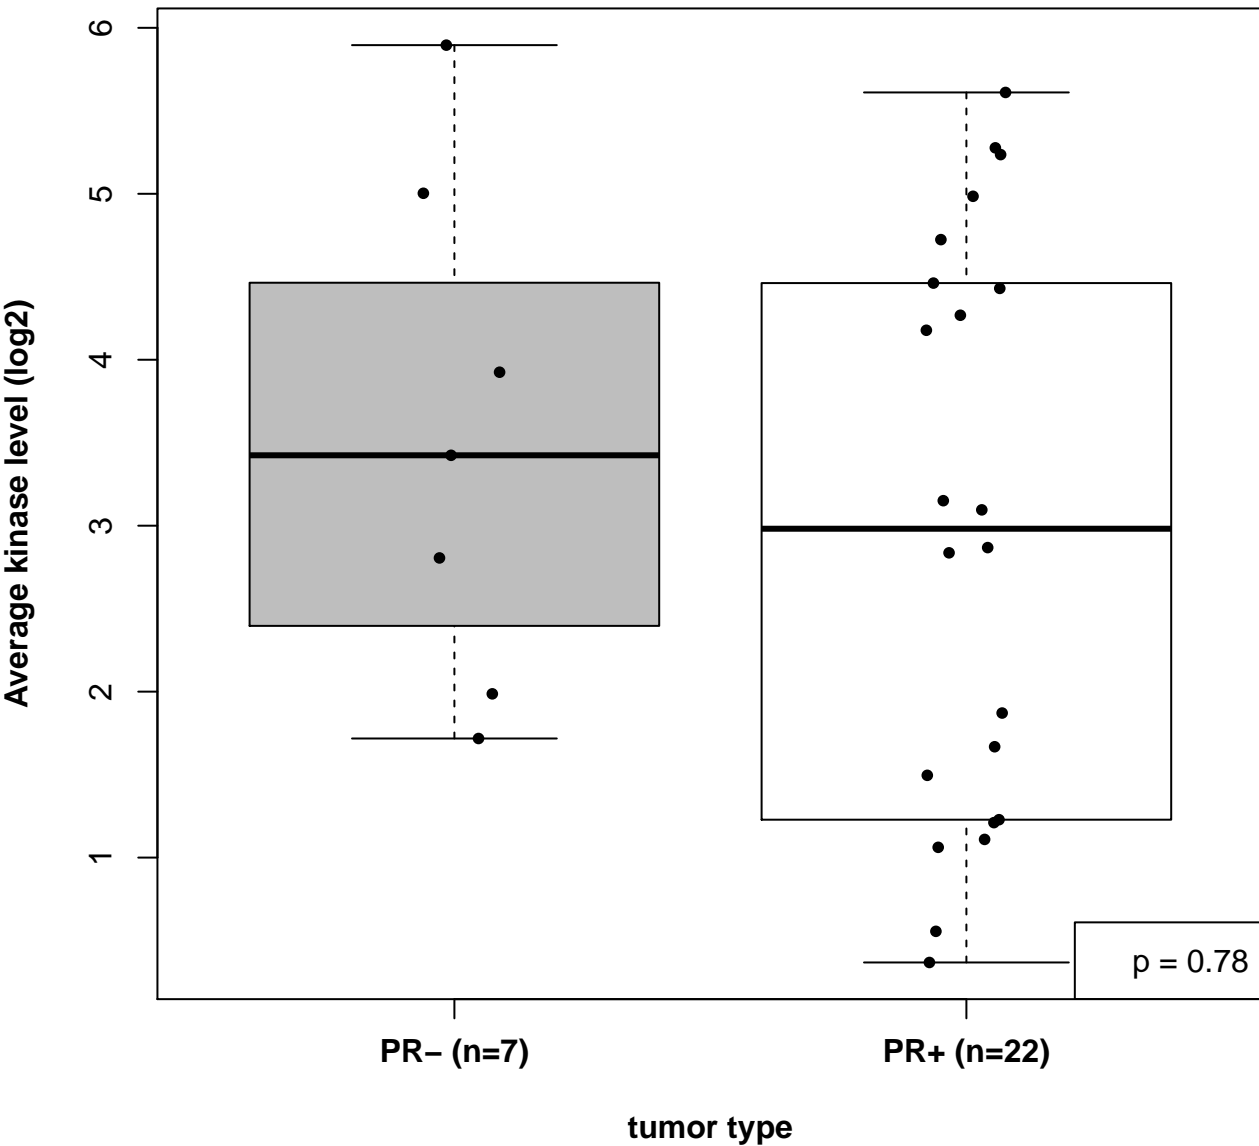

Supplement: MOESM5 [file 18213248]
