# Supplementary material for: Loss of progesterone receptor is associated with distinct tyrosine kinase profiles in breast cancer
Source: Springer Nature journal article supplement (doi:10.1007/s10549-020-05763-7), 2020-07-24
Supplement: MOESM6 [file 18213248]

| Peptide ID      | Before adding estradiol |           |           |          |            | After adding estradiol |       |        |       |       | Ratio (E10-Ctrl) |       |       |        |
|-----------------|-------------------------|-----------|-----------|----------|------------|------------------------|-------|--------|-------|-------|------------------|-------|-------|--------|
|                 | Mean                    | Mean      | Mean      | Mean     | Mean       | Mean                   | Mean  | Mean   | Mean  | Mean  | Ratio            | Ratio | Ratio |        |
| BT474_E0        | MCF7_E0                 | ZR75-1_E0 | BT474_E10 | MCF7_E10 | ZR75-1_E10 | BT474                  | MCF7  | ZR75-1 | BT474 | MCF7  | ZR75-1           | BT474 | MCF7  | ZR75-1 |
| 41_654_566      | -0.51                   | -0.87     | 1.16      | -0.49    | -0.39      | 1.10                   | 0.03  | 0.48   | 0.48  | -0.06 | -0.06            | 0.48  | -0.06 | -0.06  |
| ACHD_383_395    | -0.04                   | -0.20     | 0.14      | -0.08    | 0.08       | 0.09                   | -0.04 | 0.27   | 0.27  | -0.05 | -0.05            | 0.27  | -0.05 | -0.05  |
| AMPE 5 17       | -0.07                   | -0.16     | 0.14      | -0.16    | 0.14       | 0.10                   | -0.09 | 0.29   | 0.29  | -0.05 | -0.05            | 0.29  | -0.05 | -0.05  |
| ANXA1 14 26     | -0.51                   | -0.67     | 1.11      | -0.42    | -0.47      | 0.96                   | 0.09  | 0.21   | 0.21  | -0.15 | -0.15            | 0.21  | -0.15 | -0.15  |
| ANXA2_17_29     | -0.42                   | -0.69     | 1.23      | -0.45    | -0.67      | 1.00                   | -0.02 | 0.02   | 0.02  | -0.24 | -0.24            | 0.02  | -0.24 | -0.24  |
| BSAT_39_51      | -0.02                   | -0.11     | 0.22      | -0.16    | -0.25      | 0.33                   | -0.14 | 0.14   | 0.14  | 0.10  | 0.10             | 0.14  | 0.10  | 0.10   |
| CIR_199_211     | 0.11                    | -0.02     | -0.39     | 0.29     | -0.01      | 0.02                   | 0.18  | 0.01   | 0.01  | 0.01  | 0.01             | 0.18  | 0.01  | 0.01   |
| CALM_95_107     | 0.19                    | -0.10     | -0.30     | 0.19     | 0.28       | -0.26                  | 0.00  | 0.38   | 0.38  | 0.04  | 0.04             | 0.38  | 0.04  | 0.04   |
| CBL_693_705     | -0.25                   | -0.59     | 0.54      | -0.12    | -0.09      | 0.51                   | 0.13  | 0.50   | 0.50  | -0.03 | -0.03            | 0.50  | -0.03 | -0.03  |
| CD32_116_128    | -0.56                   | -1.02     | 1.54      | -0.69    | -0.75      | 1.49                   | -0.13 | 0.27   | 0.27  | -0.06 | -0.06            | 0.27  | -0.06 | -0.06  |
| CD32_146_158    | -0.41                   | -0.66     | 0.93      | -0.53    | -0.47      | 1.14                   | -0.12 | 0.19   | 0.19  | 0.21  | 0.21             | 0.19  | 0.21  | 0.21   |
| CDK2 8 20       | -0.77                   | -0.99     | 1.67      | -0.86    | -0.72      | 1.66                   | -0.09 | 0.28   | 0.28  | -0.02 | -0.02            | 0.28  | -0.02 | -0.02  |
| CDK7_157_169    | -0.22                   | -0.22     | 0.48      | -0.35    | 0.04       | 0.35                   | 0.05  | 0.25   | 0.25  | -0.13 | -0.13            | 0.25  | -0.13 | -0.13  |
| CRK 214 226     | 0.23                    | -0.25     | 0.12      | -0.02    | -0.21      | 0.13                   | -0.25 | 0.04   | 0.04  | 0.00  | 0.00             | 0.04  | 0.00  | 0.00   |
| CTNB1_79_91     | -0.38                   | -0.68     | 1.08      | -0.43    | -0.53      | 0.94                   | -0.05 | 0.15   | 0.15  | -0.14 | -0.14            | 0.15  | -0.14 | -0.14  |
| DCX_109_121     | -0.30                   | -0.38     | 0.60      | -0.39    | -0.15      | 0.62                   | -0.09 | 0.23   | 0.23  | 0.02  | 0.02             | 0.23  | 0.02  | 0.02   |
| DOR1_506_518    | -0.40                   | -0.15     | 0.41      | -0.50    | 0.17       | 0.46                   | -0.10 | 0.32   | 0.32  | 0.05  | 0.05             | 0.32  | 0.05  | 0.05   |
| DRY1A_212_224   | 0.09                    | 0.05      | -0.51     | 0.01     | 0.17       | 0.19                   | -0.08 | 0.12   | 0.12  | 0.70  | 0.70             | 0.12  | 0.70  | 0.70   |
| DRY1A_312_324   | -0.30                   | -0.19     | 0.37      | -0.32    | 0.10       | 0.34                   | -0.02 | 0.30   | 0.30  | -0.03 | -0.03            | 0.30  | -0.03 | -0.03  |
| EGFR 1103 1115  | -0.52                   | -0.73     | 1.25      | -0.55    | -0.60      | 1.15                   | -0.03 | 0.13   | 0.13  | -0.09 | -0.09            | 0.13  | -0.09 | -0.09  |
| EGFR_1118_1130  | 0.20                    | 0.11      | -0.55     | 0.39     | 0.03       | -0.18                  | 0.20  | -0.08  | -0.08 | 0.37  | 0.37             | -0.08 | 0.37  | 0.37   |
| EGFR_1165_1177  | -0.04                   | -0.30     | 0.40      | -0.02    | -0.42      | 0.38                   | 0.02  | -0.12  | -0.12 | -0.02 | -0.02            | -0.12 | -0.02 | -0.02  |
| EGFR_1190_1202  | 0.25                    | -0.04     | -0.44     | 0.31     | 0.21       | -0.28                  | 0.06  | 0.26   | 0.26  | 0.15  | 0.15             | 0.26  | 0.15  | 0.15   |
| EPHA1_774_786   | -1.09                   | -1.07     | 2.03      | -1.07    | -0.79      | 2.00                   | -0.02 | 0.28   | 0.28  | -0.04 | -0.04            | 0.28  | -0.04 | -0.04  |
| EPHA2_765_777   | -0.98                   | -1.05     | 1.91      | -0.99    | -0.69      | 1.80                   | -0.01 | 0.36   | 0.36  | -0.11 | -0.11            | 0.36  | -0.11 | -0.11  |
| EPHA4_589_601   | 0.08                    | -0.08     | 0.06      | 0.04     | 0.06       | -0.16                  | -0.05 | 0.14   | 0.14  | -0.22 | -0.22            | 0.14  | -0.22 | -0.22  |
| EPHA7_607_619   | -0.80                   | -0.90     | 1.51      | -0.71    | -0.55      | 1.45                   | 0.08  | 0.35   | 0.35  | -0.06 | -0.06            | 0.35  | -0.06 | -0.06  |
| EPHB1 771 783   | -0.73                   | -0.86     | 1.52      | -0.76    | -0.54      | 1.36                   | -0.03 | 0.32   | 0.32  | -0.16 | -0.16            | 0.32  | -0.16 | -0.16  |
| EPHB1_921_933   | -0.19                   | -0.16     | 0.23      | -0.36    | 0.17       | 0.31                   | -0.18 | 0.33   | 0.33  | 0.08  | 0.08             | 0.33  | 0.08  | 0.08   |
| EPHB4_583_595   | 0.00                    | 0.03      | -0.07     | -0.01    | 0.08       | -0.02                  | -0.01 | 0.05   | 0.05  | -0.05 | -0.05            | 0.05  | -0.05 | -0.05  |
| EPOR_361_373    | -0.63                   | -0.80     | 1.39      | -0.75    | -0.50      | 1.28                   | -0.13 | 0.30   | 0.30  | -0.11 | -0.11            | 0.30  | -0.11 | -0.11  |
| EPOR_419_431    | -0.54                   | -0.87     | 1.45      | -0.62    | -0.81      | 1.38                   | -0.08 | 0.06   | 0.06  | -0.07 | -0.07            | 0.06  | -0.07 | -0.07  |
| ERBB2_1241_1253 | -0.11                   | -0.66     | 0.67      | -0.15    | -0.39      | 0.65                   | -0.04 | 0.27   | 0.27  | -0.01 | -0.01            | 0.27  | -0.01 | -0.01  |
| ERBB2_870_882   | -0.51                   | -0.61     | 0.75      | -0.36    | -0.41      | 0.96                   | -0.02 | 0.20   | 0.20  | 0.21  | 0.21             | 0.20  | 0.21  | 0.21   |
| ERBB4 1181 1193 | 0.51                    | 0.25      | -0.27     | 0.43     | -0.16      | -0.75                  | -0.08 | -0.41  | -0.41 | -0.48 | -0.48            | -0.41 | -0.48 | -0.48  |
| ERBB4 1277 1289 | 0.16                    | -0.28     | 0.31      | 0.25     | -0.06      | -0.37                  | 0.09  | 0.22   | 0.22  | -0.69 | -0.69            | 0.22  | -0.69 | -0.69  |
| FAK1_569_581    | -0.27                   | -0.33     | 0.40      | -0.15    | -0.04      | 0.39                   | 0.12  | 0.28   | 0.28  | -0.01 | -0.01            | 0.28  | -0.01 | -0.01  |
| FAK2_572_584    | -0.29                   | -0.45     | 0.61      | -0.23    | -0.20      | 0.56                   | 0.03  | 0.24   | 0.24  | -0.05 | -0.05            | 0.24  | -0.05 | -0.05  |
| FER 707 719     | -0.64                   | -0.87     | 1.47      | -0.61    | -0.69      | 1.34                   | 0.05  | 0.18   | 0.18  | -0.13 | -0.13            | 0.18  | -0.13 | -0.13  |
| FES_705_718     | -0.78                   | -0.99     | 1.71      | -0.86    | -0.71      | 1.63                   | -0.07 | 0.28   | 0.28  | -0.08 | -0.08            | 0.28  | -0.08 | -0.08  |
| FGFR1_761_773   | 0.05                    | -0.23     | 0.21      | 0.01     | -0.08      | 0.04                   | -0.04 | 0.15   | 0.15  | -0.17 | -0.17            | 0.15  | -0.17 | -0.17  |
| FGFR2_762_774   | -0.03                   | -0.45     | 0.42      | 0.06     | -0.15      | 0.15                   | 0.09  | 0.30   | 0.30  | -0.27 | -0.27            | 0.30  | -0.27 | -0.27  |
| FGFR3 753 765   | -0.04                   | -0.56     | 0.56      | 0.02     | -0.26      | 0.28                   | 0.07  | 0.30   | 0.30  | -0.28 | -0.28            | 0.30  | -0.28 | -0.28  |
| INSR 1348 1360  | 0.16                    | 0.08      | -0.16     | 0.05     | 0.06       | -0.20                  | -0.11 | -0.02  | -0.02 | -0.04 | -0.04            | -0.02 | -0.04 | -0.04  |
| INSR_992_1004   | 0.21                    | -0.07     | -0.21     | 0.32     | 0.14       | -0.39                  | 0.11  | 0.20   | 0.20  | -0.18 | -0.18            | 0.20  | -0.18 | -0.18  |
| JAK1_1015_1027  | -0.40                   | -0.69     | 1.03      | -0.50    | -0.44      | 1.01                   | -0.10 | 0.24   | 0.24  | -0.02 | -0.02            | 0.24  | -0.02 | -0.02  |
| JAK2_563_577    | -0.42                   | -0.59     | 0.94      | -0.49    | -0.32      | 0.87                   | -0.07 | 0.27   | 0.27  | -0.08 | -0.08            | 0.27  | -0.08 | -0.08  |
| K2C6B_53_65     | -0.25                   | -0.34     | 0.51      | -0.19    | -0.07      | 0.34                   | 0.06  | 0.27   | 0.27  | -0.17 | -0.17            | 0.27  | -0.17 | -0.17  |
| K2C8_425_437    | -0.15                   | -0.30     | 0.58      | -0.09    | -0.36      | 0.33                   | 0.06  | -0.06  | -0.06 | -0.25 | -0.25            | 0.06  | -0.25 | -0.25  |
| KSYK_518_530    | 0.17                    | -0.17     | -0.24     | 0.20     | 0.05       | -0.01                  | 0.03  | 0.23   | 0.23  | 0.22  | 0.22             | 0.23  | 0.22  | 0.22   |
| LAT 194 206     | -0.08                   | -0.41     | 0.27      | -0.11    | -0.03      | 0.01                   | -0.03 | 0.15   | 0.15  | 0.00  | 0.00             | 0.15  | 0.00  | 0.00   |
| LAT 249 261     | -0.37                   | -0.55     | 0.76      | -0.48    | -0.16      | 0.81                   | -0.11 | 0.38   | 0.38  | 0.05  | 0.05             | 0.38  | 0.05  | 0.05   |
| LCK_387_399     | -0.60                   | -0.85     | 1.44      | -0.57    | -0.68      | 1.27                   | 0.03  | 0.17   | 0.17  | -0.17 | -0.17            | 0.17  | -0.17 | -0.17  |
| MMP_198_210     | -0.32                   | -0.21     | 0.46      | -0.37    | -0.07      | 0.51                   | -0.05 | 0.14   | 0.14  | 0.05  | 0.05             | 0.14  | 0.05  | 0.05   |
| MMP_259_271     | -0.06                   | -0.15     | 0.02      | -0.05    | -0.07      | 0.32                   | 0.01  | 0.08   | 0.08  | 0.30  | 0.30             | 0.08  | 0.30  | 0.30   |
| MMP_263_275     | -0.15                   | -0.05     | 0.25      | -0.21    | 0.00       | -0.06                  | -0.06 | 0.05   | 0.05  | -0.08 | -0.08            | 0.05  | -0.08 | -0.08  |
| NET_1227_1239   | -0.61                   | -0.61     | 0.91      | -0.32    | -0.44      | 0.82                   | 0.04  | 0.18   | 0.18  | -0.08 | -0.08            | 0.18  | -0.08 | -0.08  |
| NK01_180_192    | -0.09                   | -0.18     | 0.22      | -0.03    | -0.10      | 0.19                   | 0.07  | 0.08   | 0.08  | -0.03 | -0.03            | 0.08  | -0.03 | -0.03  |
| NK07 211 223    | -0.33                   | -0.04     | 0.44      | -0.30    | -0.04      | 0.27                   | 0.03  | 0.00   | 0.00  | -0.16 | -0.16            | 0.00  | -0.16 | -0.16  |
| NK10 216 228    | -0.31                   | -0.35     | 0.62      | -0.34    | -0.13      | 0.50                   | -0.03 | 0.22   | 0.22  | -0.12 | -0.12            | 0.22  | -0.12 | -0.12  |
| NK12_178_190    | -0.05                   | -0.26     | 0.25      | -0.02    | -0.15      | 0.23                   | 0.03  | 0.11   | 0.11  | -0.01 | -0.01            | 0.11  | -0.01 | -0.01  |
| NK14_171_185    | -0.14                   | -0.26     | 0.20      | -0.08    | -0.22      | 0.06                   | -0.05 | 0.04   | 0.04  | 0.14  | 0.14             | 0.04  | 0.14  | 0.14   |
| NCF1_313_325    | -0.34                   | -0.34     | 0.56      | -0.37    | 0.01       | 0.46                   | -0.03 | 0.35   | 0.35  | -0.10 | -0.10            | 0.35  | -0.10 | -0.10  |
| NPT2A_501_513   | -0.31                   | -0.21     | 0.44      | -0.35    | 0.04       | 0.39                   | -0.01 | 0.25   | 0.25  | -0.04 | -0.04            | 0.25  | -0.04 | -0.04  |
| NTRK2_696_708   | -0.40                   | -0.63     | 1.03      | -0.48    | -0.44      | 0.91                   | -0.09 | 0.19   | 0.19  | -0.12 | -0.12            | 0.19  | -0.12 | -0.12  |
| ODBA_340_352    | 0.14                    | -0.37     | 0.05      | 0.05     | 0.00       | 0.12                   | -0.09 | 0.37   | 0.37  | 0.07  | 0.07             | 0.37  | 0.07  | 0.07   |
| PBSA 600 612    | -0.82                   | -1.17     | 1.94      | -0.94    | -0.87      | 1.86                   | -0.12 | 0.30   | 0.30  | -0.08 | -0.08            | 0.30  | -0.08 | -0.08  |
| PAI1_24_36      | -0.63                   | -0.89     | 1.53      | -0.84    | -0.61      | 1.45                   | -0.11 | 0.29   | 0.29  | -0.08 | -0.08            | 0.29  | -0.08 | -0.08  |
| PDPK1_2_14      | -0.43                   | -0.55     | 0.85      | -0.49    | -0.23      | 0.86                   | -0.06 | 0.32   | 0.32  | 0.01  | 0.01             | 0.32  | 0.01  | 0.01   |
| PDPK1_369_381   | -0.64                   | -0.88     | 1.48      | -0.66    | -0.68      | 1.38                   | -0.01 | 0.20   | 0.20  | -0.11 | -0.11            | 0.20  | -0.11 | -0.11  |
| PECA1_706_718   | -0.67                   | -1.05     | 1.67      | -0.84    | -0.71      | 1.60                   | -0.16 | 0.34   | 0.34  | -0.08 | -0.08            | 0.34  | -0.08 | -0.08  |
| PGFRB_1002_1014 | -0.14                   | -0.52     | 0.58      | -0.23    | -0.30      | 0.61                   | -0.09 | 0.23   | 0.23  | 0.03  | 0.03             | 0.23  | 0.03  | 0.03   |
| PGFRB_1014_1028 | -0.08                   | -0.53     | 0.61      | -0.11    | -0.20      | 0.62                   | 0.00  | 0.24   | 0.24  | 0.01  | 0.01             | 0.24  | 0.01  | 0.01   |
| PGFRB 709 721   | -0.18                   | -0.41     | 0.71      | -0.34    | -0.23      | 0.45                   | -0.16 | 0.18   | 0.18  | -0.25 | -0.25            | 0.18  | -0.25 | -0.25  |
| PGFRB 768 780   | -0.38                   | -0.59     | 1.00      | -0.38    | -0.45      | 0.81                   | -0.09 | 0.14   | 0.14  | -0.20 | -0.20            | 0.14  | -0.20 | -0.20  |
| PGFRB_771_783   | -0.36                   | -0.52     | 1.04      | -0.45    | -0.52      | 0.81                   | -0.00 | 0.00   | 0.00  | -0.22 | -0.22            | 0.00  | -0.22 | -0.22  |
| PP2AB_297_309   | 0.06                    | -0.23     | 0.14      | 0.00     | -0.04      | 0.07                   | -0.06 | 0.19   | 0.19  | -0.07 | -0.07            | 0.19  | -0.07 | -0.07  |
| PRKR_786_798    | -0.04                   | -0.47     | 0.61      | -0.18    | -0.26      | 0.34                   | -0.14 | 0.21   | 0.21  | -0.27 | -0.27            | 0.21  | -0.27 | -0.27  |
| PRRX2_202_214   | -0.29                   | -0.48     | 0.86      | -0.38    | -0.26      | 0.56                   | -0.09 | 0.22   | 0.22  | -0.30 | -0.30            | 0.22  | -0.30 | -0.30  |
| PTN11_539_551   | -0.09                   | -0.08     | 0.13      | -0.06    | 0.00       | 0.10                   | 0.03  | 0.08   | 0.08  | -0.03 | -0.03            | 0.08  | -0.03 | -0.03  |
| RAF1_332_344    | -0.42                   | -0.80     | 1.21      | -0.60    | -0.54      | 1.14                   | -0.18 | 0.26   | 0.26  | -0.07 | -0.07            | 0.26  | -0.07 | -0.07  |
| RASA1 453 465   | -0.52                   | -0.79     | 1.26      | -0.62    | -0.49      | 1.15                   | -0.10 | 0.30   | 0.30  | -0.11 | -0.11            | 0.30  | -0.11 | -0.11  |

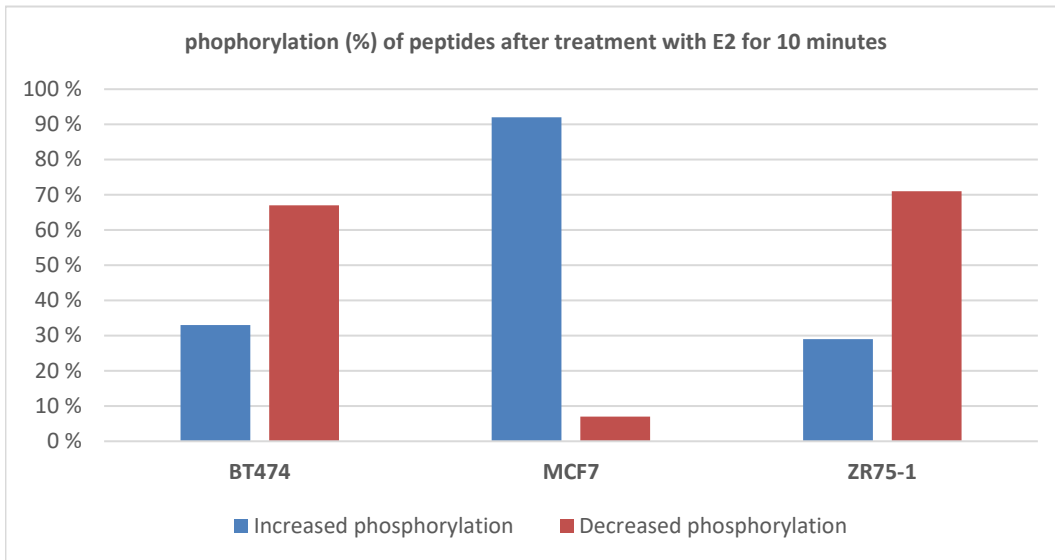

**p. value**

**BT474 E0 vs E10** 4,742E-01  
**MCF7 E0 vs E10** 2,712E-05  
**ZR751 E0 vs E10** 6,671E-01

**\* E0= no treatment with estradiol, E10 = treatment with estradiol for 10 minutes**
