# Supplementary material for: Loss of progesterone receptor is associated with distinct tyrosine kinase profiles in breast cancer
Source: Springer Nature journal article supplement (doi:10.1007/s10549-020-05763-7), 2020-07-24
Supplement: MOESM8 [file 18213248]

# overlaps shown: 50  
 # genesets in collections: 2199  
 # genes in comparison (n): 629  
 # genes in universe (N): 38055

| Gene Set Name                                          | # Genes in Gene Set (K) | Description                                                                                        | # Genes in Overlap (k) | k/K    | p-value  | FDR q-value |
|--------------------------------------------------------|-------------------------|----------------------------------------------------------------------------------------------------|------------------------|--------|----------|-------------|
| REACTOME_INTRAFLAGELLAR_TRANSPORT                      | 54                      | Intraflagellar transport                                                                           | 12                     | 0.2222 | 6.83E-11 | 1.5E-7      |
| REACTOME_CILIUM_ASSEMBLY                               | 201                     | Cilium Assembly                                                                                    | 20                     | 0.0995 | 1.91E-10 | 2.1E-7      |
| REACTOME_ORGANELLE_BIOGENESIS_AND_MAINTENANCE          | 295                     | Organelle biogenesis and maintenance                                                               | 22                     | 0.0746 | 5.72E-9  | 4.19E-6     |
| REACTOME_TRANSPORT_OF_SMALL_MOLECULES                  | 728                     | Transport of small molecules                                                                       | 35                     | 0.0481 | 2.53E-8  | 1.39E-5     |
| REACTOME_CELL_CYCLE                                    | 642                     | Cell Cycle                                                                                         | 31                     | 0.0483 | 1.45E-7  | 6.37E-5     |
| REACTOME_METABOLISM_OF_LIPIDS                          | 738                     | Metabolism of lipids                                                                               | 33                     | 0.0447 | 3.32E-7  | 1.21E-4     |
| KEGG_PURINE_METABOLISM                                 | 159                     | Purine metabolism                                                                                  | 14                     | 0.0881 | 4.6E-7   | 1.44E-4     |
| REACTOME_CELL_CYCLE_MITOTIC                            | 536                     | Cell Cycle, Mitotic                                                                                | 26                     | 0.0485 | 1.34E-6  | 3.69E-4     |
| REACTOME_INNATE_IMMUNE_SYSTEM                          | 1104                    | Innate Immune System                                                                               | 41                     | 0.0371 | 1.63E-6  | 3.99E-4     |
| REACTOME_SIGNALING_BY_RECEPTOR_TYROSINE_KINASES        | 468                     | Signaling by Receptor Tyrosine Kinases                                                             | 23                     | 0.0491 | 4.38E-6  | 9.63E-4     |
| REACTOME_MITOTIC_PROMETAPHASE                          | 198                     | Mitotic Prometaphase                                                                               | 14                     | 0.0707 | 6.2E-6   | 1.15E-3     |
| REACTOME_NEURONAL_SYSTEM                               | 411                     | Neuronal System                                                                                    | 21                     | 0.0511 | 6.28E-6  | 1.15E-3     |
| REACTOME_MHC_CLASS_II_ANTIGEN_PRESENTATION             | 124                     | MHC class II antigen presentation                                                                  | 11                     | 0.0887 | 7.22E-6  | 1.22E-3     |
| PID_ERA_GENOMIC_PATHWAY                                | 64                      | Validated nuclear estrogen receptor alpha network                                                  | 8                      | 0.1250 | 1.04E-5  | 1.64E-3     |
| REACTOME_NEUTROPHIL_DEGRANULATION                      | 478                     | Neutrophil degranulation                                                                           | 22                     | 0.0460 | 1.94E-5  | 2.84E-3     |
| REACTOME_SLC_MEDIATED_TRANSMEMBRANE_TRANSPORT          | 250                     | SLC-mediated transmembrane transport                                                               | 15                     | 0.0600 | 2.09E-5  | 2.87E-3     |
| REACTOME_GENERIC_TRANSCRIPTION_PATHWAY                 | 1218                    | Generic Transcription Pathway                                                                      | 40                     | 0.0328 | 3.72E-5  | 4.63E-3     |
| REACTOME_ESTROGEN_DEPENDENT_GENE_EXPRESSION            | 148                     | Estrogen-dependent gene expression                                                                 | 11                     | 0.0743 | 3.82E-5  | 4.63E-3     |
| REACTOME_METABOLISM_OF_NUCLEOTIDES                     | 99                      | Metabolism of nucleotides                                                                          | 9                      | 0.0909 | 4.02E-5  | 4.63E-3     |
| PID_SHP2_PATHWAY                                       | 57                      | SHP2 signaling                                                                                     | 7                      | 0.1228 | 4.21E-5  | 4.63E-3     |
| NABA_ECM_REGULATORS                                    | 238                     | Genes encoding enzymes and their regulators involved in the remodeling of the extracellular matrix | 14                     | 0.0588 | 4.85E-5  | 4.86E-3     |
| REACTOME_TRANSMISSION_ACROSS_CHEMICAL_SYNAPSES         | 269                     | Transmission across Chemical Synapses                                                              | 15                     | 0.0558 | 4.8E-5   | 4.86E-3     |
| REACTOME_NON_INTEGRIN_MEMBRANE_ECM_INTERACTIONS        | 59                      | Non-integrin membrane-ECM interactions                                                             | 7                      | 0.1186 | 5.28E-5  | 5.05E-3     |
| KEGG_GALACTOSE_METABOLISM                              | 26                      | Galactose metabolism                                                                               | 5                      | 0.1923 | 5.99E-5  | 5.49E-3     |
| REACTOME_HEMOSTASIS                                    | 674                     | Hemostasis                                                                                         | 26                     | 0.0386 | 7.11E-5  | 6.25E-3     |
| REACTOME_ESR_MEDIATED_SIGNALING                        | 219                     | ESR-mediated signaling                                                                             | 13                     | 0.0594 | 8.15E-5  | 6.33E-3     |
| PID_HNF3A_PATHWAY                                      | 44                      | FOXA1 transcription factor network                                                                 | 6                      | 0.1364 | 8.24E-5  | 6.33E-3     |
| PID_INSULIN_PATHWAY                                    | 44                      | Insulin Pathway                                                                                    | 6                      | 0.1364 | 8.24E-5  | 6.33E-3     |
| REACTOME_GENE_EXPRESSION_TRANSCRIPTION                 | 1486                    | Gene expression (Transcription)                                                                    | 45                     | 0.0303 | 8.35E-5  | 6.33E-3     |
| PID_A6B1_A6B4_INTEGRIN_PATHWAY                         | 46                      | a6b1 and a6b4 Integrin signaling                                                                   | 6                      | 0.1304 | 1.06E-4  | 7.79E-3     |
| REACTOME_RHO_GTPASES_ACTIVATE_FORMINS                  | 139                     | RHO GTPases Activate Formins                                                                       | 10                     | 0.0719 | 1.12E-4  | 7.95E-3     |
| REACTOME_DISEASE                                       | 1075                    | Disease                                                                                            | 35                     | 0.0326 | 1.33E-4  | 8.75E-3     |
| REACTOME_SIGNALING_BY_NUCLEAR_RECEPTORS                | 262                     | Signaling by Nuclear Receptors                                                                     | 14                     | 0.0534 | 1.35E-4  | 8.75E-3     |
| REACTOME_TRANSCRIPTIONAL_REGULATION_BY_TP53            | 363                     | Transcriptional Regulation by TP53                                                                 | 17                     | 0.0468 | 1.35E-4  | 8.75E-3     |
| REACTOME_DISEASES_OF_GLYCOSYLATION                     | 143                     | Diseases of glycosylation                                                                          | 10                     | 0.0699 | 1.42E-4  | 8.85E-3     |
| KEGG_COMPLEMENT_AND_COAGULATION_CASCADES               | 69                      | Complement and coagulation cascades                                                                | 7                      | 0.1014 | 1.45E-4  | 8.85E-3     |
| REACTOME_ACTIVATION_OF_C3_AND_C5                       | 7                       | Activation of C3 and C5                                                                            | 3                      | 0.4286 | 1.5E-4   | 8.9E-3      |
| REACTOME_RECRUITMENT_OF_NUMA_TO_MITOTIC_CENTROSOMES    | 94                      | Recruitment of NuMA to mitotic centrosomes                                                         | 8                      | 0.0851 | 1.7E-4   | 9.86E-3     |
| KEGG_PROPANOATE_METABOLISM                             | 33                      | Propanoate metabolism                                                                              | 5                      | 0.1515 | 1.96E-4  | 1.11E-2     |
| REACTOME_DEVELOPMENTAL_BIOLOGY                         | 1104                    | Developmental Biology                                                                              | 35                     | 0.0317 | 2.2E-4   | 1.2E-2      |
| KEGG_PYRIMIDINE_METABOLISM                             | 98                      | Pyrimidine metabolism                                                                              | 8                      | 0.0816 | 2.27E-4  | 1.2E-2      |
| KEGG_CELL_CYCLE                                        | 124                     | Cell cycle                                                                                         | 9                      | 0.0726 | 2.29E-4  | 1.2E-2      |
| REACTOME_RESOLUTION_OF_SISTER_CHROMATID_COHESION       | 125                     | Resolution of Sister Chromatid Cohesion                                                            | 9                      | 0.0720 | 2.43E-4  | 1.24E-2     |
| REACTOME_CYTOKINE_SIGNALING_IN_IMMUNE_SYSTEM           | 856                     | Cytokine Signaling in Immune system                                                                | 29                     | 0.0339 | 2.58E-4  | 1.29E-2     |
| REACTOME_TRANSPORT_OF_CONNEXONS_TO_THE_PLASMA_MEMBRANE | 20                      | Transport of connexons to the plasma membrane                                                      | 4                      | 0.2000 | 2.9E-4   | 1.42E-2     |
| REACTOME_M_PHASE                                       | 392                     | M Phase                                                                                            | 17                     | 0.0434 | 3.32E-4  | 1.58E-2     |
| REACTOME_SIGNALING_BY_MET                              | 79                      | Signaling by MET                                                                                   | 7                      | 0.0886 | 3.38E-4  | 1.58E-2     |
| KEGG_ACUTE_MYELOID_LEUKEMIA                            | 57                      | Acute myeloid leukemia                                                                             | 6                      | 0.1053 | 3.53E-4  | 1.62E-2     |
| PID_ERBB4_PATHWAY                                      | 38                      | ErbB4 signaling events                                                                             | 5                      | 0.1316 | 3.88E-4  | 1.74E-2     |
| BIOCARTA_CTLA4_PATHWAY                                 | 22                      | The Co-Stimulatory Signal During T-cell Activation                                                 | 4                      | 0.1818 | 4.27E-4  | 1.86E-2     |
