# Supplementary material for: Loss of progesterone receptor is associated with distinct tyrosine kinase profiles in breast cancer
Source: Springer Nature journal article supplement (doi:10.1007/s10549-020-05763-7), 2020-07-24
Supplement: MOESM10 [file 18213248]

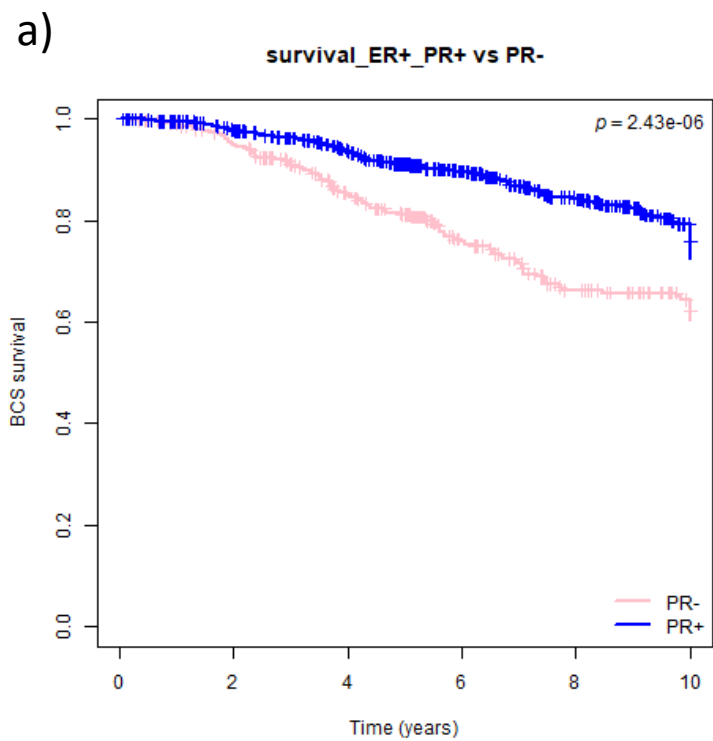

n= 1052 ER+ samples  
ER+/PR+  
ER+/PR-

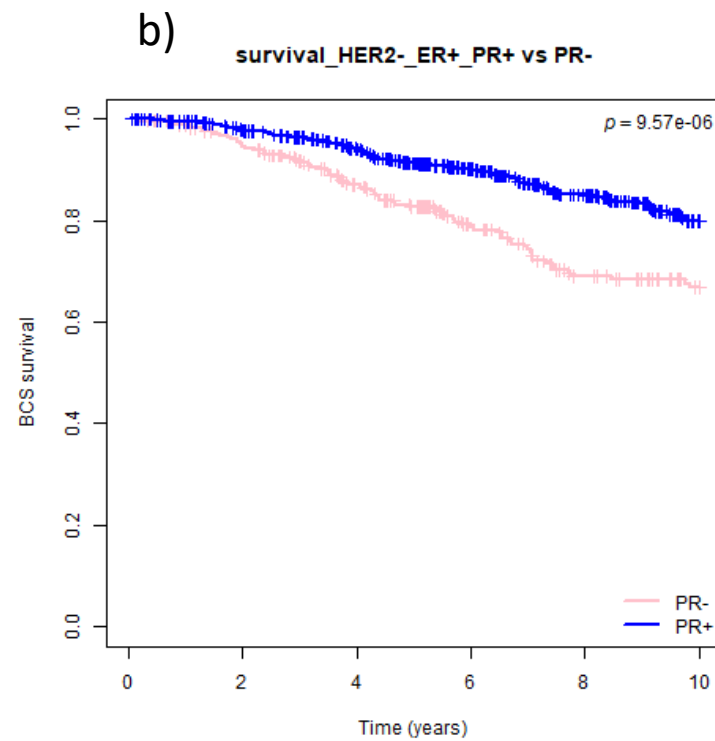

n= 977 ER+/HER2- samples  
ER+/HER2-/PR+  
ER+/HER2-/PR-

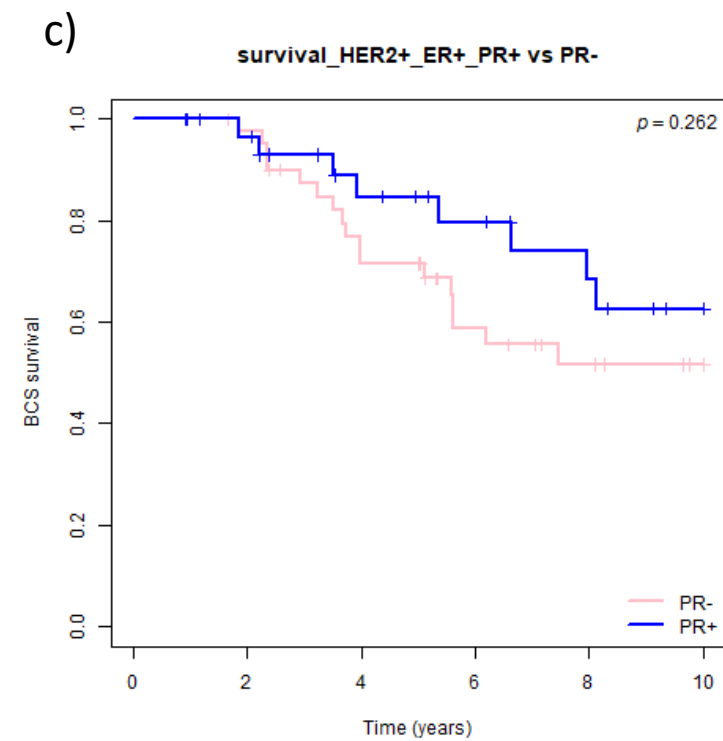

N = 75 ER+/HER2+ samples  
ER+/HER2+/PR+  
ER+/HER2+/PR-
